# Supplementary material for: Spatial engineering of a Co(OH)x encapsulated p-Cu2S/n-BiVO4 photoanode: simultaneously promoting charge separation and surface reaction kinetics in solar water splitting
Source: Royal Society of Chemistry journal article supplement (doi:10.1039/c9ta00171a), 2019-01-01
Supplement: c9ta00171a1.pdf [file c9ta00171a1.pdf]

## Electronic Supplementary Information

# Spatial Engineering of Co(OH)<sub>x</sub> Encapsulated *p*-Cu<sub>2</sub>S/*n*-BiVO<sub>4</sub> Photoanode: Simultaneously Promoting Charge Separation and Surface Reaction Kinetics in Solar Water Splitting

Bing He,<sup>‡,a</sup> Yang Wang,<sup>‡,ab</sup> Xueqin Liu,<sup>\*a</sup> Yinchang Li,<sup>a</sup> Xiaoqin Hu,<sup>a</sup> Jing Huang,<sup>a</sup> Yongsheng Yu,<sup>c</sup>  
Zhu Shu,<sup>a</sup> Zhen Li,<sup>\*a</sup> and Yanli Zhao<sup>\*b</sup>

<sup>a</sup>*Engineering Research Center of Nano-Geomaterials of Ministry of Education, Faculty of Materials Science and Chemistry, China University of Geosciences, Wuhan, Hubei 430074, P. R. China*

<sup>b</sup>*Division of Chemistry and Biological Chemistry, School of Physical and Mathematical Sciences, Nanyang Technological University, 21 Nanyang Link, 637371, Singapore*

<sup>c</sup>*College of Chemistry and Chemical Engineering, Xinyang Normal University, Xinyang, Henan 464000, P. R. China*

<sup>‡</sup>*These authors contributed equally.*

E-mail: liuxq@cug.edu.cn, zhenli@cug.edu.cn, zhaoyanli@ntu.edu.sg

---

## Experimental section

### Preparation of worm-like BiVO<sub>4</sub> electrode

The BiVO<sub>4</sub> photoanode was fabricated by an electrodeposition method. First, Bi(NO<sub>3</sub>)<sub>3</sub> solution (15 mM) was prepared by dissolving Bi(NO<sub>3</sub>)<sub>3</sub>·5H<sub>2</sub>O in 0.4 M KI and 30 mM lactic acid solution (50 mL, pH = 1.8, adjusted by HNO<sub>3</sub> solution). Ethanol (20 mL) containing *p*-benzoquinone (46 mM) was slowly added into the Bi(NO<sub>3</sub>)<sub>3</sub> solution, and the obtained mixture was vigorously stirred for 20 min. Then, the electrodeposition in the prepared electrolyte was carried out in a typical three-electrode system, with a piece of FTO (3 × 1 cm<sup>2</sup>) working electrode (WE), a saturated Ag/AgCl reference electrode (RE) and a platinum foil (1.5 × 1.5 cm<sup>2</sup>) counter electrode (CE). Cathodic deposition was conducted potentiostatically at -0.35 V vs. Ag/AgCl for 30 s and -0.1 V vs. Ag/AgCl at room temperature for 1200 s. The obtained orange BiOI precursor was rinsed with pure water and then dried with N<sub>2</sub>. Next, the BiOI precursor was converted to BiVO<sub>4</sub> by placing DMSO solution (0.1 mL) containing VO(acac)<sub>2</sub> (0.2 M) on the BiOI electrode (1 × 2 cm<sup>2</sup>) and heating in a muffle furnace at 450 °C (ramping rate = 2 °C min<sup>-1</sup>) for 2 h to obtain BiVO<sub>4</sub>. Excess V<sub>2</sub>O<sub>5</sub> presented in the BiVO<sub>4</sub> electrode was removed by soaking them in NaOH solution (1 M) for 5 min with mild stirring. The resulting worm-like BiVO<sub>4</sub> electrode was rinsed with pure water and dried in air.<sup>1</sup>

### Preparation of Cu<sub>2</sub>S/BiVO<sub>4</sub> composite electrode

Cu<sub>2</sub>S/BiVO<sub>4</sub> composite was synthesized by a successive ionic layer adsorption and reaction (SILAR) method.<sup>2</sup> The saturated CuCl aqueous solution and Na<sub>2</sub>S (5 mM) were used to fabricate Cu<sub>2</sub>S NP decorated BiVO<sub>4</sub> electrode. To control the deposition amount of Cu<sub>2</sub>S, the electrode was immersed in solution for 10, 20, 30 and 40 s (recorded as 1-Cu<sub>2</sub>S/BiVO<sub>4</sub>, 2-Cu<sub>2</sub>S/BiVO<sub>4</sub>, 3-Cu<sub>2</sub>S/BiVO<sub>4</sub> and 4-Cu<sub>2</sub>S/BiVO<sub>4</sub>, respectively). Taking 20 s as an example, the BiVO<sub>4</sub> electrode was firstly immersed in the CuCl solution for 20 s to adsorb Cu<sup>+</sup> on the surface of BiVO<sub>4</sub> electrode, followed by washing with pure water for 60 s. The sample was then immersed in the Na<sub>2</sub>S solution for another 20 s to promote the reaction of S<sup>2-</sup> with the adsorbed Cu<sup>+</sup> on the surface of BiVO<sub>4</sub> electrode and rinsed again with pure water for 60 s.

---

The resulting Cu<sub>2</sub>S/BiVO<sub>4</sub> composite photoanode was washed with pure water and dried in air.

### **Deposition of Co(OH)<sub>x</sub> on Cu<sub>2</sub>S/BiVO<sub>4</sub> composite electrode (CCB)**

The outmost Co(OH)<sub>x</sub> layer on the photoelectrode was also prepared using the SILAR method.<sup>3</sup> The Cu<sub>2</sub>S/BiVO<sub>4</sub> composite structure was successively immersed into Co(CH<sub>3</sub>COO)<sub>2</sub> aqueous solution (100 mL, 50 mM), pure water, NaOH aqueous solution (100 mL, 100 mM), and pure water each for 60 s to finish one cycle deposition of the Co(OH)<sub>x</sub> layer. In order to obtain the optimal amount of Co(OH)<sub>x</sub> layer, the above SILAR cycle was repeated for 1, 3, 5 and 7 times, and the corresponding samples are recorded as 1-CCB, 3-CCB, 5-CCB, and 7-CCB, respectively.

### **Characterizations**

The obtained products were characterized by a Bruker D8 Advanced X-ray diffractometer (XRD, Bruker AXS D8-Focus). The morphology and size of the materials were characterized by a field-emission scanning electron microscope (FESEM, SU8010) associated with an X-ray energy-dispersive spectrometer (EDS). Transmission electron microscopy (TEM, Talos F200S) images were visualized using a transmission electron microscope at an acceleration voltage of 120 kV. The light absorption properties of as-prepared samples were measured by a UV-Vis diffuse reflectance spectrometer (UV-2550PC spectrophotometer). The photoluminescence measurements were carried out using a Fluoromax 4P spectrofluorometer (Horiba) with a laser ( $\lambda = 380$  nm) at room temperature. The surface bonding information was analyzed by X-ray photoelectron spectroscopy (XPS, Physical Electronics PHI 1600 ESCA).

### **Photoelectrochemical (PEC) measurements**

The PEC measurements of pure BiVO<sub>4</sub>, Cu<sub>2</sub>S/BiVO<sub>4</sub> and CCB composite structures were all achieved with an electrochemical workstation (CHI 650E) in a standard three-electrode system. The photoanodes (pure BiVO<sub>4</sub>, Cu<sub>2</sub>S/BiVO<sub>4</sub> and CCB), a platinum foil (1.5 × 1.5 cm<sup>2</sup>) and a saturated Ag/AgCl electrode were acted as the WE, CE and RE, respectively. The

---

simulated solar illumination was by a 150 W Xenon arc lamp with an AM 1.5G filter (100 mW cm<sup>-2</sup>), and phosphate buffer solution (KPi, 0.5 M, pH = 10) with or without sodium sulfite (Na<sub>2</sub>SO<sub>3</sub>, 1 M) was used as the electrolyte after N<sub>2</sub> bubbling for 0.5 h.

The current density-potential (J-V) curves were obtained by scanning with continuous voltage changes from -1 V to 1 V vs. Ag/AgCl at a scan rate of 10 mV s<sup>-1</sup>. The measured potentials were converted to the reversible hydrogen electrode (RHE) using the Nernst equation:  $E_{RHE} = E_{Ag/AgCl} + 0.059 \times pH + E^0_{Ag/AgCl}$ , where  $E_{RHE}$  is the converted potential vs. RHE,  $E_{Ag/AgCl}$  is experimentally measured potential against Ag/AgCl reference electrode, and  $E^0_{Ag/AgCl} = 0.1976$  V (vs. Ag/AgCl) at 25 °C.<sup>4</sup>

IPCE was measured at 1.23 V<sub>RHE</sub> in the same electrolyte and three-electrode setup mentioned above. A solar simulator (300 W Xe arc lamp) and a monochromator were coupled to scan the wavelength of the incident light.

The Mott-Schottky plots were obtained at an amplitude of 10 mV and a frequency of 10<sup>3</sup> Hz. Electrochemical impedance spectroscopy (EIS) was investigated by applying a small AC amplitude of 50 mV and a frequency range from 10<sup>4</sup> to 10<sup>-2</sup> Hz at open circuit potential.

The H<sub>2</sub> generation rate was determined in an airtight N<sub>2</sub> flow system equipped using a GC7920 gas chromatography. Before the measurement, the system was flowed with N<sub>2</sub> for several hours to remove residual air. The photoanodes were immersed in a mildly stirred KPi solution (0.5 M, pH 10) under AM 1.5G illumination at a bias of 1.23 V<sub>RHE</sub>.

## Calculations

### Incident photon-to-electron conversion efficiency (IPCE)

IPCE was calculated by the following equation:<sup>5</sup>

$$IPCE = \frac{1240 \times I(\text{mA} \cdot \text{cm}^{-2})}{P_{\text{light}}(\text{mW} \cdot \text{cm}^{-2}) \times \lambda(\text{nm})} \times 100\%$$

where  $\lambda$  is the wavelength of incident light,  $I$  is the measured photocurrent density at specific wavelength, and  $P_{\text{light}}$  is the measured light power density at that wavelength (100 mW cm<sup>-2</sup>).

### Applied bias photon-to-current efficiency (ABPE)

ABPE was calculated from the  $J$ - $V$  curve shown in Fig. 3a. Assuming 100% Faradaic efficiency, the value of ABPE was obtained by the following equation: <sup>5</sup>

$$ABPE = \frac{I(\text{mA} \cdot \text{cm}^{-2}) \times (1.23 - V_{\text{bias}})(\text{V})}{P_{\text{light}}(\text{mW} \cdot \text{cm}^{-2})} \times 100\%$$

where  $I$  is the photocurrent density at specific potential,  $V_{\text{bias}}$  is the applied bias between WE and RHE, and  $P_{\text{light}}$  is the incident illumination power density (100 mW cm<sup>-2</sup>).

### Charge separation efficiency

The photocurrent density under sulfite oxidation conditions was calculated by the following formula:

$$J_{PEC} = J_{\text{abs}} \times \eta_{\text{bulk}} \times \eta_{\text{surface}}$$

where  $J_{\text{abs}}$  represents the photocurrent density, which is the value obtained by the electrodes thoroughly converting the absorbed photons to current. The  $J_{\text{abs}}$  of BiVO<sub>4</sub> and Cu<sub>2</sub>S/BiVO<sub>4</sub> were 5.62 mA cm<sup>-2</sup> and 6.18 mA cm<sup>-2</sup>, which were calculated by overlapped area integration of standard solar absorption spectrum and UV-Vis absorption spectrum, respectively (Fig. S5).  $\eta_{\text{bulk}}$  (relating to bulk charge separation) and  $\eta_{\text{surface}}$  (relating to surface reaction kinetics) could be determined by using the following formulas: <sup>6</sup>

$$\eta_{\text{bulk}} = \frac{J_{\text{sulfite}}}{J_{\text{abs}}} \times 100\%$$

$$\eta_{\text{surface}} = \frac{J_{\text{water}}}{J_{\text{sulfite}}} \times 100\%$$

where  $J_{\text{sulfite}}$  and  $J_{\text{water}}$  are the photocurrent density in the electrolyte with and without sulfite oxidation shown in Fig. 3a,f, respectively.

### Carrier density (Nd) through the Mott-Schottky plots

The  $Nd$  of the obtained photoanode could be roughly estimated through the following equation:

$$Nd = \frac{2}{e_0 \epsilon \epsilon_0} \left[ \frac{d(1/C^2)}{dV} \right]^{-1}$$

where  $\epsilon_0$  is the permittivity of free space ( $8.85 \times 10^{-12}$  F m<sup>-1</sup>),  $\epsilon$  is the dielectric constant of

---

$\text{BiVO}_4$  (68),<sup>7</sup>  $e_0$  is electron charge ( $1.60 \times 10^{-19}$  C), and  $d(1/C^2)/d\nu$  is the slope of the curve shown in Mott-Schottky plots (Fig. 4d).

### **Band gap ( $E_g$ ), valence band (VB) position and conduction band (CB) position**

The band gap of semiconductor could be estimated based on the absorption spectrum using the following equation:

$$\alpha = A(h\nu - E_g)^{1/2}/h\nu$$

where  $\alpha$  is the diffuse reflectance we measured,  $A = \log(1/R)$ , which R is diffuse reflectance, and  $h\nu = hc/\lambda = 1240/\lambda$ .

As shown in Fig. S5b, d,  $h\nu$  as the abscissa,  $(\alpha h\nu)^2$  as the ordinate, the intersection of the tangent, and the X-axis is  $E_g$ , the optical band gap of pure  $\text{BiVO}_4$ ,  $\text{Cu}_2\text{S}/\text{BiVO}_4$  and CCB is 2.46, 2.43 and 2.42 eV, respectively.

Valence band (VB) position and conduction band (CB) position were calculated using the absolute electronegativity value of the semiconductor *via* equations as follows:

$$E_{VB} = X - E_e + 1/2E_g$$

$$E_{CB} = E_{VB} - E_g$$

The value of the absolute electronegativity  $X$  in the formula was calculated from the geometric mean of the absolute electronegativity of the atoms in the semiconductor. The values of  $\text{BiVO}_4$  and  $\text{Cu}_2\text{S}$  are 6.04 and 5.00, respectively.<sup>8</sup>  $E_e$  is the energy of free electrons on the hydrogen scale ( $\sim 4.50$  eV). Bringing these parameters into the above equations, the VB positions of  $\text{BiVO}_4$  and  $\text{Cu}_2\text{S}$  are 2.76 eV and 1.12 eV, and the CB positions are 0.31 eV and -0.13 eV, respectively.

### **Lifetime of the photogenerated carriers ( $\tau_n$ )**

The lifetime of the photogenerated carriers ( $\tau_n$ ) obtained from the OCVD was calculated by the equation:

$$\tau_n = -\frac{k_B T}{e} \left( \frac{dOCP}{dt} \right)^{-1}$$

---

where  $\tau_n$  is the carrier lifetime,  $k_B T$  is the thermal energy, and  $e$  is the positive element charge. The carrier lifetime could be quantified for the comparison of the charge recombination rate in the junction.

Additional figures and discussions

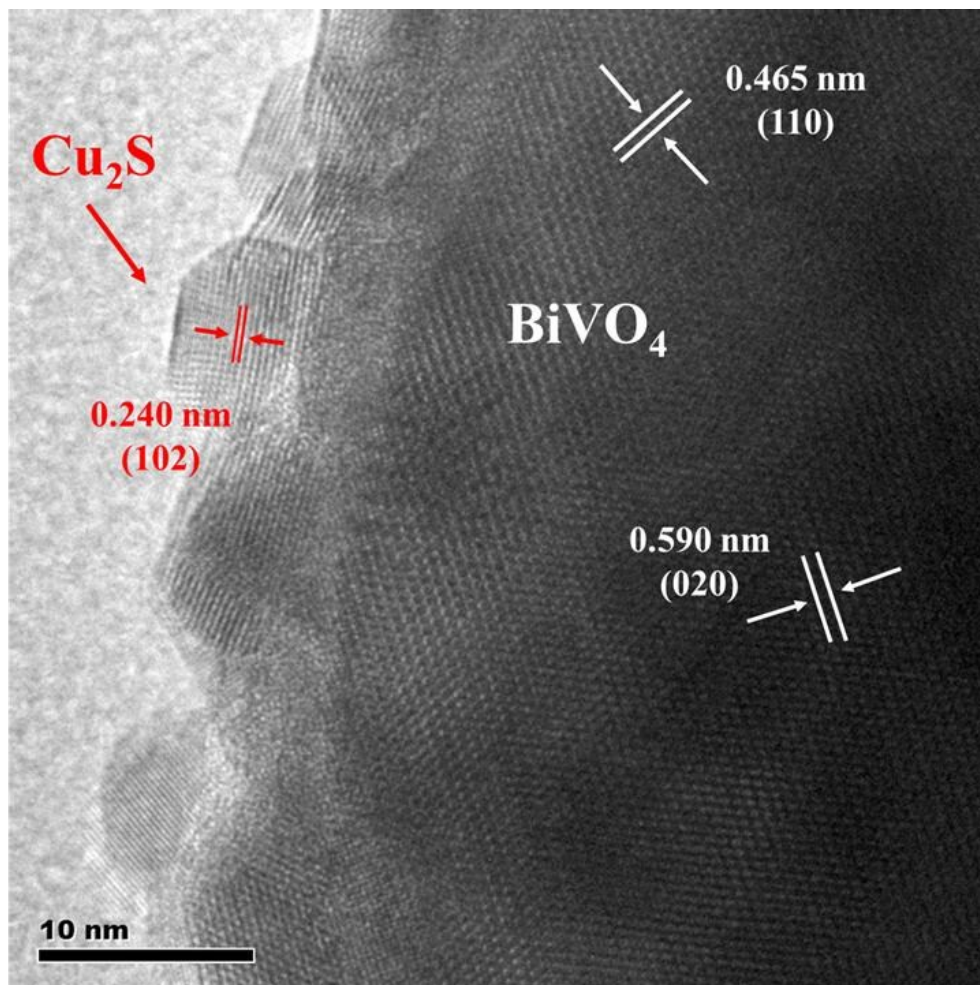

Fig. S1 HRTEM image of Cu<sub>2</sub>S/BiVO<sub>4</sub>.



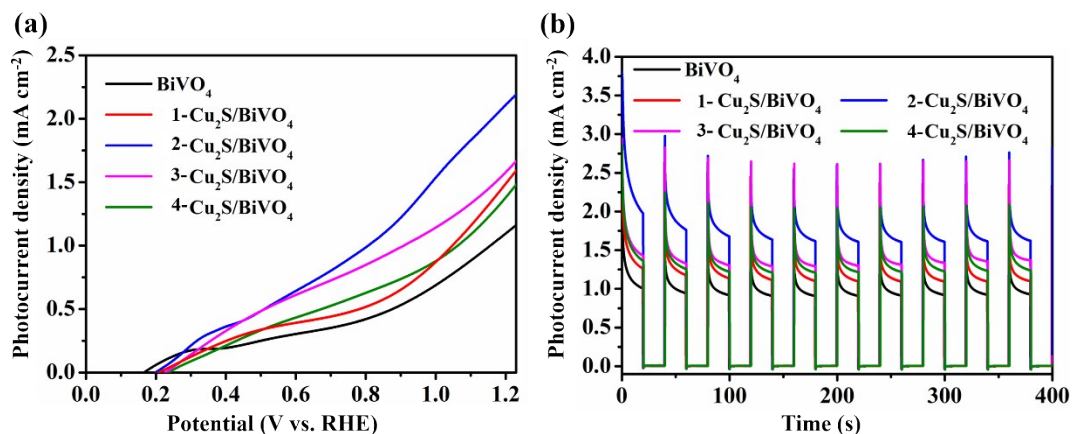

**Fig. S2** (a) LSV curves and (b) J-t curves measured at 1.23 V<sub>RHE</sub> under chopped AM 1.5G in KPi (pH = 10) of Cu<sub>2</sub>S/BiVO<sub>4</sub> with different Cu<sub>2</sub>S NP loading amounts.

The effect of the deposition amount of Cu<sub>2</sub>S NPs, controlled by immersion time, on the PEC performance of *p*-Cu<sub>2</sub>S/*n*-BiVO<sub>4</sub> heterojunction was investigated in detail, as shown in Fig. S2. The highest photocurrent of 2.19 mA cm<sup>-2</sup> at 1.23 V<sub>RHE</sub> was achieved by 2-Cu<sub>2</sub>S/BiVO<sub>4</sub> (*i.e.*, the sample prepared by immersion time of 20 s). With further increase of immersion time, the surface of BiVO<sub>4</sub> was attached by excessive Cu<sub>2</sub>S NPs, becoming new recombination sites of electrons and holes. In general, the catalytic activity of a *p-n* heterojunction photoanode is closely related to the amount and dispersion of its outer *p*-type semiconductors.

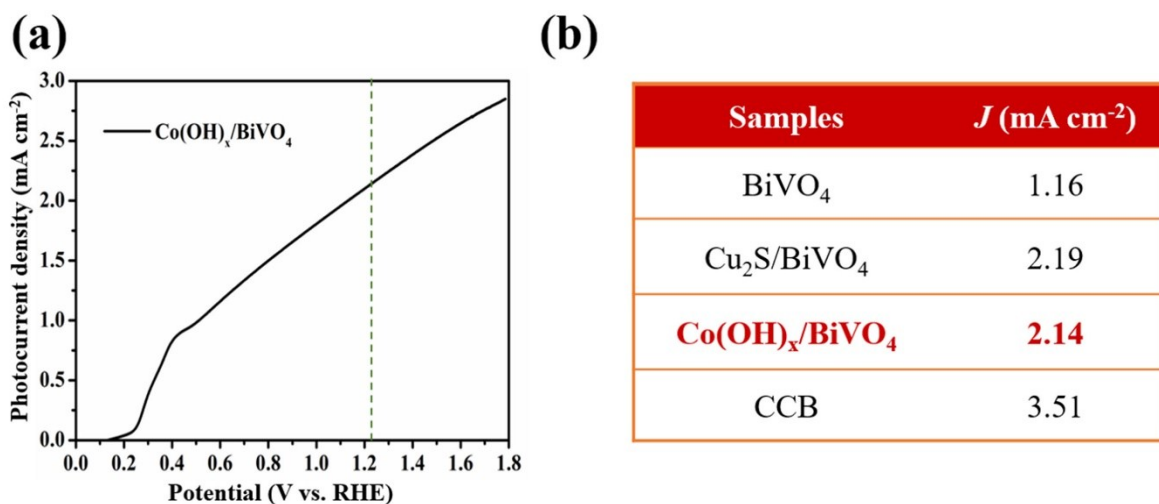

**Fig. S3** (a) LSV curve and AM 1.5G in KPi solution (pH = 10) for Co(OH)<sub>x</sub>/BiVO<sub>4</sub> and (b) photocurrent density for different samples in KPi solution at 1.23 V vs RHE.

After integrating Cu<sub>2</sub>S and Co(OH)<sub>x</sub>, the onset potential of CCB showed a slightly positive shift less than ~30 mV. The slight shift may be due to the interface resistance of the outer loading layer. Upon increasing the bias potential, this shift disappeared and the photocurrent density increased significantly.

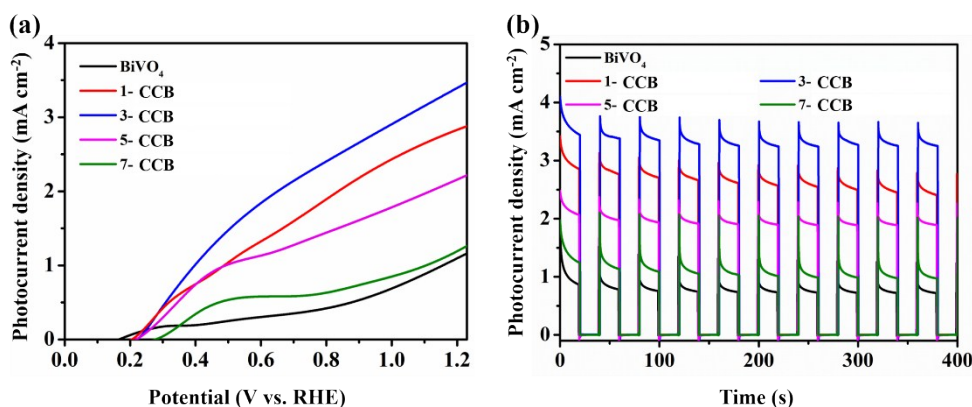

**Fig. S4** (a) LSV curves and (b) J-t curves measured at 1.23  $V_{\text{RHE}}$  under chopped AM 1.5G in KPi (pH = 10) of CCB with different  $\text{Co(OH)}_x$  loading amounts.

The PEC performance of CCB photoanode is significantly affected by the  $\text{Co(OH)}_x$  content, as shown in Fig. S4. Compared to the bare  $\text{BiVO}_4$  photoanode, all CCB electrodes exhibit remarkably improved photo-induced current density, indicating the efficient modification to the  $\text{BiVO}_4$  photoanode *via* the simultaneous introduction of *p*-type  $\text{Cu}_2\text{S}$  NPs and  $\text{Co(OH)}_x$  OECs. Specifically, when the SILAR cycle was increased from 1 to 3 times, the photocurrent increased obviously. However, when the SILAR cycle was increased further to 5 or 7 times, the photocurrents decreased, presumably because the excess  $\text{Co(OH)}_x$  would increase the transfer resistance of photo-induced holes. Consequently, to maximize the synergistic effect of *p-n* heterojunction and  $\text{Co(OH)}_x$  in CCB photoanode, the optimal immersion time for  $\text{Cu}_2\text{S}$  NPs and immersion cycle time for  $\text{Co(OH)}_x$  are 20 s and 3 times, respectively. At this condition, the highest photocurrent density of 3.51 mA cm<sup>-2</sup> at 1.23  $V_{\text{RHE}}$  was obtained for the CCB photoanode.

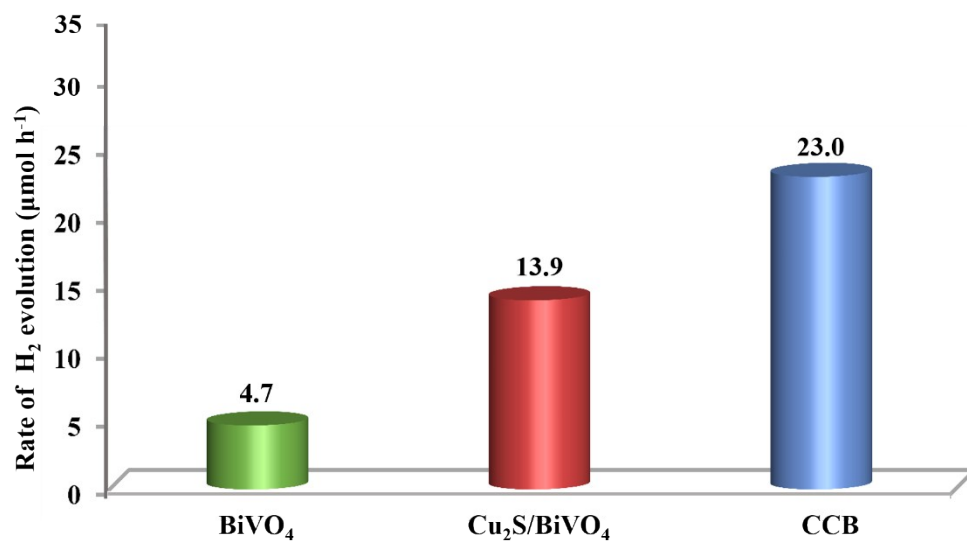

**Fig. S5** Rate of H<sub>2</sub> evolution for BiVO<sub>4</sub>, Cu<sub>2</sub>S/BiVO<sub>4</sub> and CCB.

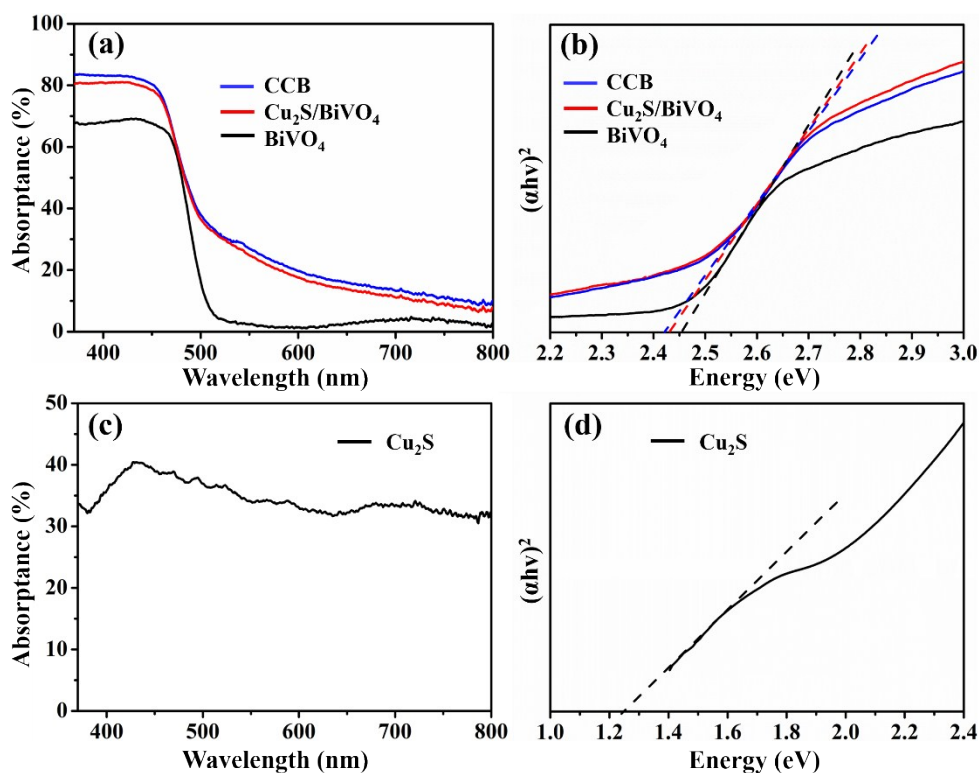

**Fig. S6** (a) UV-Vis absorbance spectra and (b) Tauc plots of BiVO<sub>4</sub>, Cu<sub>2</sub>S/BiVO<sub>4</sub> and CCB photoanodes. (c) UV-Vis absorbance spectrum and (d) Tauc plot of Cu<sub>2</sub>S NPs.

The optical absorption properties of the obtained samples were characterized by UV-Vis diffuse reflectance spectroscopy, as shown in Fig. S6. Bare BiVO<sub>4</sub> electrode shows an absorbance edge at ~520 nm (Fig. S6a), corresponding well to the band gap of 2.4-2.5 eV.<sup>9</sup> After the deposition of Cu<sub>2</sub>S NPs, the Cu<sub>2</sub>S/BiVO<sub>4</sub> heterojunction exhibits the extension of light absorption in the visible light wavelength, which is attributed to the narrow band gap of Cu<sub>2</sub>S ( $E_g = 1.25$  eV), as shown in Fig. S6d. The CCB electrode displays a similar absorption curve to that of Cu<sub>2</sub>S/BiVO<sub>4</sub>, implying the weak light absorption of ultrathin Co(OH)<sub>x</sub> film.

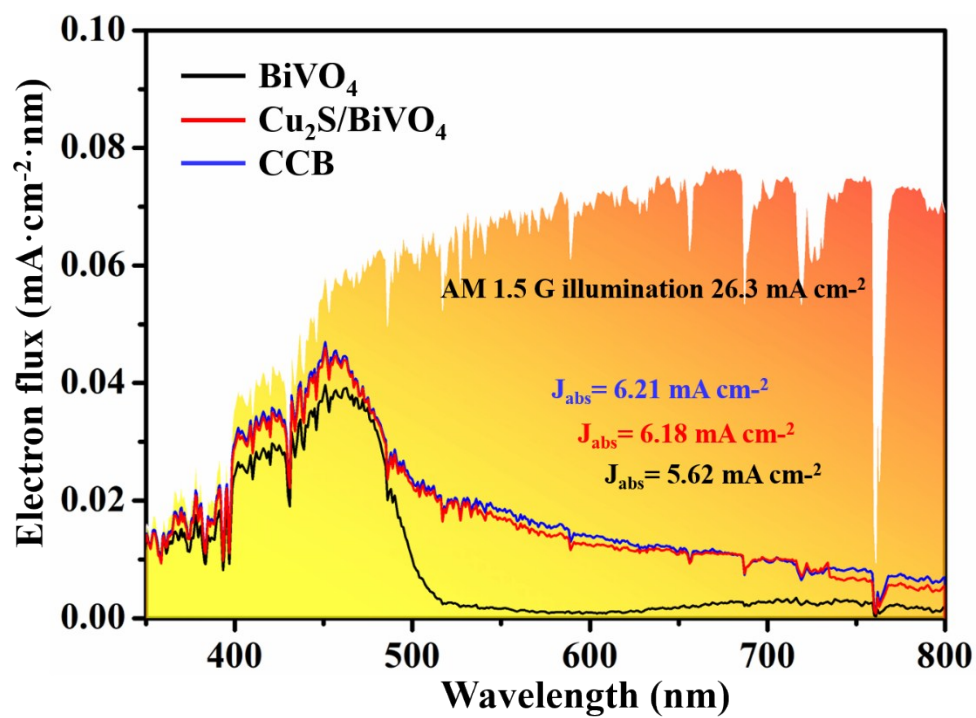

Fig. S7 Electron flux of AM 1.5G solar spectrum, BiVO<sub>4</sub>, Cu<sub>2</sub>S/BiVO<sub>4</sub> and CCB photoanodes.

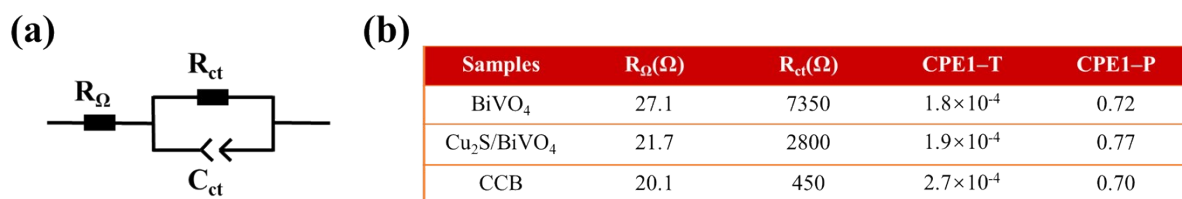

**Fig. S8** (a) Randles equivalent circuit model and (b) fitting results of  $R_{\Omega}$ ,  $R_{ct}$ , CPE1-T and CPE1-P for different samples in KPi solution without Na<sub>2</sub>SO<sub>3</sub> by ZVIEW.

The EIS Nyquist plots for all these photoanodes could be assigned to the series resistance ( $R_{\Omega}$ ) and the interfacial charge transfer resistance ( $R_{ct}$ ) of the electrode/electrolyte boundary with the Randles equivalent circuit model (Fig. S8). Clearly, the radius of pure BiVO<sub>4</sub> photoanode is much larger than that of *p*-Cu<sub>2</sub>S/*n*-BiVO<sub>4</sub> heterojunction electrode, indicating that the *p-n* heterojunction effectively reduces the interface resistance and facilitates the transfer of photogenerated holes. After the coating of Co(OH)<sub>x</sub>,  $R_{ct}$  of CCB decreases significantly, suggesting that, as a water oxidation kinetic catalyst, Co(OH)<sub>x</sub> in the composite electrode improves the hole transfer dynamics effectively.

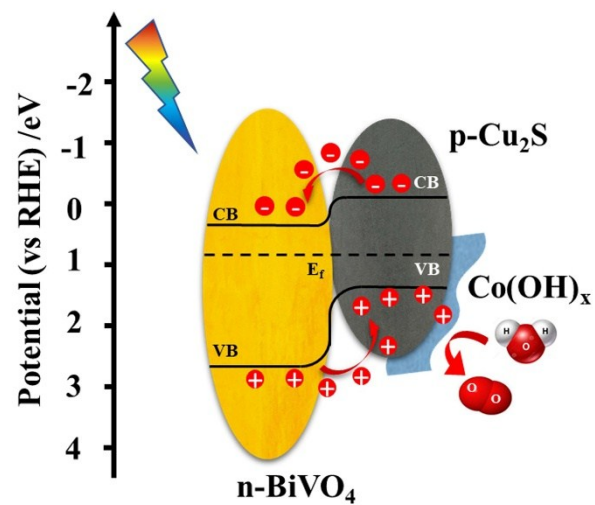

**Fig. S9** Proposed band diagram and mechanism of charge separation for CCB.



**Tab. S1.** Comparison of the solar-driven photoactivity for water oxidation of the current photoanodes with the reported most active BiVO<sub>4</sub>-based photoanodes prepared by different methods based on the photocurrent density J (mA cm<sup>-2</sup>) obtained at 1.23 V under AM 1.5G, 100 mW cm<sup>-2</sup> illumination.

| Photoanode                                                                | Electrolyte                                    | J (mA cm <sup>-2</sup> ) | Ref.      |
|---------------------------------------------------------------------------|------------------------------------------------|--------------------------|-----------|
| FTO/BiVO <sub>4</sub> /Cu <sub>2</sub> S/Co(OH) <sub>x</sub>              | 0.5 M KPi (pH 10)                              | ~3.51                    | this work |
| FTO/BiVO <sub>4</sub> /ZnFe <sub>2</sub> O <sub>4</sub> /Co <sup>2+</sup> | 0.1 M KOH (pH 13)                              | ~2.84                    | 10        |
| FTO/BiVO <sub>4</sub> /CoFe <sub>2</sub> O <sub>4</sub>                   | 0.5 M Na <sub>2</sub> SO <sub>4</sub> (pH 7.3) | ~0.65                    | 11        |
| FTO/BiVO <sub>4</sub> /FeF <sub>2</sub>                                   | 0.5 M Na <sub>2</sub> SO <sub>4</sub>          | ~2.49                    | 12        |
| FTO/BiVO <sub>4</sub> /Cu <sub>2</sub> O                                  | 0.1 M PBS (pH 7)                               | ~1.72                    | 7         |
| FTO/BiVO <sub>4</sub> /NiB                                                | 0.5 M KBi (pH 9.5)                             | ~4.82                    | 13        |
| FTO/ BiVO <sub>4</sub> /AgO <sub>x</sub> /NiO <sub>x</sub>                | 0.5 M KBi (pH 9.25)                            | ~2.05                    | 14        |
| FTO/BiVO <sub>4</sub> /FeOOH/NiOOH                                        | 1 M KBi (pH 9.5)                               | ~5.31                    | 15        |
| FTO/BiVO <sub>4</sub> /CoBi                                               | 1 M KBi (pH 9.5)                               | ~3.20                    | 10        |
| FTO/BiVO <sub>4</sub> /Co <sub>3</sub> O <sub>4</sub>                     | 0.5 M KPi (pH 7)                               | ~2.71                    | 8         |
| FTO/BiVO <sub>4</sub> / LDH/ CdTe-QD                                      | 0.1 M KPi (pH 7)                               | ~2.23                    | 16        |

---

## References

- 1 T. W. Kim and K. S. Choi, *Science*, 2014, **343**, 990–994.
- 2 K. Guo, Z. Liu, C. Zhou, J. Han, Y. Zhao, Z. Liu, Y. Li, T. Cui, B. Wang and J. Zhang, *Appl. Catal. B: Environ.*, 2014, **154–155**, 27–35.
- 3 M. Liao, J. Feng, W. Luo, Z. Wang, J. Zhang, Z. Li, T. Yu and Z. Zou, *Adv. Funct. Mater.*, 2012, **22**, 3066–3074.
- 4 B. Zhang, L. Wang, Y. Zhang, Y. Ding and Y. Bi, *Angew. Chem., Int. Ed. Engl.*, 2018, **57**, 2248–2252.
- 5 R. Tang, S. Zhou, Z. Yuan and L. Yin, *Adv. Funct. Mater.*, 2017, **27**, 1701102.
- 6 Y. Wang, F. Li, X. Zhou, F. Yu, J. Du, L. Bai and L. Sun, *Angew. Chem., Int. Ed.*, 2017, **56**, 6911–6915.
- 7 S. Bai, J. Liu, M. Cui, R. Luo and J. He, A. Chen, *Dalton Trans*, 2018, **47**, 6763–6771.
- 8 X. Chang, T. Wang, P. Zhang, J. Zhang, A. Li and J. Gong, *J. Am. Chem. Soc.*, **2015**, 137, 8356–8359.
- 9 B. J. Trzeźniewski and W. A. Smith, *J. Mater. Chem. A*, 2016, **4**, 2919–2926.
- 10 T. W. Kim and K.-S. Choi, *J. Phy. Chem. Lett.*, 2016, **7**, 447–451.
- 11 Q. Wang, J. He, Y. Shi, S. Zhang, T. Niu, H. She, Y. Bi and Z. Lei, *Appl. Catal. B: Environ.*, 2017, **214**, 158–167.
- 12 Q. Wang, T. Niu, L. Wang, C. Yan, J. Huang, J. He, H. She, B. Su and Y. Bi, *Chem. Eng. J.*, 2018, **337**, 506–514.
- 13 S. Wang, T. He, J.-H. Yun, Y. Hu, M. Xiao, A. Du and L. Wang, *Adv. Funct. Mater.*, 2018, **28**, 1802685.
- 14 Y. Hu, Y. Wu, J. Feng, H. Huang, C. Zhang, Q. Qian, T. Fang, J. Xu, P. Wang, Z. Li and Z. Zou, *J. Mater. Chem. A*, 2018, **6**, 2568–2576.
- 15 S. Wang, P. Chen, Y. Bai, J. H. Yun, G. Liu and L. Wang, *Adv Mater*, 2018, **30**, 1800486.
- 16 Y. Q. Tang, R. R. Wang, Y. Yang, D. P. Yan and X. Xu, *ACS Appl. Mater. Interfaces*, 2016, **8**, 19446–19455.
